# Supplementary material for: High Fruit and Vegetable Consumption and Moderate Fat Intake Are Associated with Higher Carotenoid Concentration in Human Plasma
Source: PubMed Central journal article supplement (PMC8002704; doi:10.3390/antiox10030473), 2021-03-17
Supplement: antioxidants-10-00473-s001.pdf [file antioxidants-10-00473-s001.pdf]

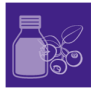

Article

# Supplementary Materials: High Fruit and Vegetable Consumption and Moderate Fat Intake Are Associated with Higher Carotenoid Concentration in Human Plasma

María Marhuenda-Muñoz <sup>1,2</sup>, José Fernando Rinaldi de Alvarenga <sup>3</sup>, Álvaro Hernáez <sup>1,4,5,6</sup>, Anna Tresserra-Rimbau <sup>1,2</sup>, Miguel Ángel Martínez-González <sup>1,7,8</sup>, Jordi Salas-Salvadó <sup>1,9,10,11</sup>, Dolores Corella <sup>1,12</sup>, Mireia Malcampo <sup>13</sup>, José Alfredo Martínez <sup>1,14,15</sup>, Ángel M. Alonso-Gómez <sup>1,16,17</sup>, Julia Wärnberg <sup>1,18</sup>, Jesús Vioque <sup>19,20</sup>, Dora Romaguera <sup>1,21</sup>, José López-Miranda <sup>1,22</sup>, Ramón Estruch <sup>1,23</sup>, Francisco J. Tinahones <sup>1,24</sup>, José Lapetra <sup>1,25</sup>, J. Lluís Serra-Majem <sup>1,26</sup>, Aurora Bueno-Cavanillas <sup>18,27</sup>, Josep A. Tur <sup>1,21,28</sup>, Vicente Martín Sánchez <sup>15,29</sup>, Xavier Pinto <sup>1,30</sup>, Miguel Delgado-Rodríguez <sup>15,31</sup>, Pilar Matía-Martín <sup>32</sup>, Josep Vidal <sup>33,34</sup>, Clotilde Vázquez <sup>1,35</sup>, Lidia Daimiel <sup>15</sup>, Emilio Ros <sup>1,36</sup>, Mercè Serra-Mir <sup>36</sup>, Zenaida Vázquez-Ruiz <sup>1,7</sup>, Stephanie K. Nishi <sup>1,9,10,11</sup>, Jose V. Sorlí <sup>1,12</sup>, María Dolores Zomeño <sup>5,13</sup>, María Angeles Zulet <sup>1,14,15</sup>, Jessica Vaquero-Luna <sup>16,17</sup>, Rosa Carabaño-Moral <sup>37</sup>, Leyre Notario-Barandiaran <sup>19,20</sup>, Marga Morey <sup>1,21</sup>, Antonio García-Ríos <sup>1,22</sup>, Ana M. Gómez-Pérez <sup>1,24</sup>, José Manuel Santos-Lozano <sup>1,25</sup>, Pilar Buil-Cosiales <sup>1,7,38</sup>, Josep Basora <sup>1,9,11,39</sup>, Olga Portolés <sup>1,12</sup>, Helmut Schröder <sup>13,19</sup>, Itziar Abete <sup>1,14,15</sup>, Itziar Salaverria-Lete <sup>16</sup>, Estefanía Toledo <sup>1,7</sup>, Nancy Babio <sup>1,9,10,11</sup>, Montse Fitó <sup>1,13</sup>, Miriam Martínez-Huélamo <sup>2</sup> and Rosa M Lamuela-Raventós <sup>1,2,\*</sup>

- <sup>1</sup> Centro de Investigación Biomédica en Red Fisiopatología de la Obesidad y la Nutrición (CIBEROBN), Instituto de Salud Carlos III, 28029 Madrid, Spain; mmarhuendam@ub.edu (M.M.-M.); alvaro.hernaez@fhi.no (Á.H.); annatresserra@ub.edu (A.T.-R.); mamartinez@unav.es (M.Á.M.-G.); jordi.salas@urv.cat (J.S.-S.); dolores.corella@uv.es (D.C.); jalfmtz@unav.es (J.A.M.); angelmago13@gmail.com (Á.M.A.-G.); jwarnberg@uma.es (J.W.); mariaadoracion.romaguera@ssib.es (D.R.); jlopezmir@uco.es (J.L.-M.); restruch@clinic.cat (R.E.); fjtinahones@hotmail.com (F.J.T.); joselapetra543@gmail.com (J.L.); lserra@dcc.ulpgc.es (J.L.S.-M.); pep.tur@uib.es (J.A.T.); xpinto@bellvitgehospital.cat (X.P.); clotilde.vazquez@fjd.es (C.V.); eros@clinic.cat (E.R.); zvazquez@unav.es (Z.V.-R.); stephanie.nishi@urv.cat (S.K.N.); jose.sorli@uv.es (J.V.S.); mazulet@unav.es (M.A.Z.); marga.morey@yahoo.es (M.M.); angarios2004@yahoo.es (A.G.-R.); anamgp86@gmail.com (A.M.G.-P.); jsantos11@us.es (J.M.S.-L.); pilarbuilc@gmail.com (P.B.-C.); jbasora@idiapjgol.org (J.B.); olga.portoles@uv.es (O.P.); iabetego@unav.es (I.A.); etoledo@unav.es (E.T.); nancy.babio@urv.cat (N.B.); mfito@imim.es (M.F.)
- <sup>2</sup> Department of Nutrition, Food Science and Gastronomy, School of Pharmacy and Food Sciences and XaRTA, Institute of Nutrition and Food Safety (INSA-UB), University of Barcelona, 08921 Santa Coloma de Gramenet, Spain; mmartinez8@gmail.com
- <sup>3</sup> Food Research Center (FoRC), Department of Food Science and Experimental Nutrition, School of Pharmaceutical Sciences, University of São Paulo, 05508-000 São Paulo, Brazil; zehfernando@gmail.com
- <sup>4</sup> Centre for Fertility and Health, Norwegian Institute of Public Health, 0473 Oslo, Norway
- <sup>5</sup> Blanquerna School of Health Sciences. Universitat Ramon Llull, 08025 Barcelona, Spain; mzomeno@imim.es
- <sup>6</sup> August Pi Sunyer Biomedical Research Center (IDIBAPS), 08036 Barcelona, Spain
- <sup>7</sup> Department of Preventive Medicine and Public Health, University of Navarra, IdiSNA, 31008 Pamplona, Spain
- <sup>8</sup> Department of Nutrition, Harvard T.H. Chan School of Public Health, Boston, MA 02115, USA
- <sup>9</sup> Departament de Bioquímica i Biotecnologia, Unitat de Nutrició, Universitat Rovira i Virgili, 43204 Reus, Spain
- <sup>10</sup> Nutrition Unit, University Hospital of Sant Joan de Reus, 43201 Reus, Spain
- <sup>11</sup> Institut d'Investigació Sanitària Pere Virgili (IISPV), 43201 Reus, Spain
- <sup>12</sup> Department of Preventive Medicine, University of Valencia, 46010 Valencia, Spain
- <sup>13</sup> Unit of Cardiovascular Risk and Nutrition, Institut Hospital del Mar de Investigaciones Médicas (IMIM), 08007 Barcelona, Spain; mireiamalcampo@gmail.com (M.M.); HSchoeder@imim.es (H.S.)
- <sup>14</sup> Center for Nutrition Research, Department of Nutrition, Food Sciences, and Physiology, University of Navarra, 31008 Pamplona, Spain
- <sup>15</sup> Precision Nutrition Program, IMDEA Food, CEI UAM + CSIC, 28049 Madrid, Spain; vicente.martin@unileon.es (V.M.S.); mdelgado@ujaen.es (M.D.-R.); lidia.daimiel@imdea.org (L.D.)

- <sup>16</sup> Bioaraba Health Research Institute, Cardiovascular, Respiratory and Metabolic Area, 01009 Vitoria-Gasteiz, Spain; luna\_jess\_@hotmail.com (J.V.-L.); itziar\_salaverria@yahoo.es (I.S.-L.)
- <sup>17</sup> Osakidetza Basque Health Service, Araba University Hospital, University of the Basque Country UPV/EHU, 01009 Vitoria-Gasteiz, Spain
- <sup>18</sup> Department of Nursing, School of Health Sciences, Instituto de Investigación Biomédica de Málaga (IBIMA), University of Málaga, 29010 Málaga, Spain; abueno@ugr.es
- <sup>19</sup> CIBER de Epidemiología y Salud Pública (CIBERESP), Instituto de Salud Carlos III, 28029 Madrid, Spain; vioque@umh.es (J.V.); Inotario@umh.es (L.N.-B.)
- <sup>20</sup> Unit of Nutritional Epidemiology, Miguel Hernandez University, ISABIAL-FISABIO, 03010 Alicante, Spain
- <sup>21</sup> Health Research Institute of the Balearic Islands (IdISBa), 07120 Palma de Mallorca, Spain
- <sup>22</sup> Department of Internal Medicine, Maimonides Biomedical Research Institute of Cordoba (IMIBIC), Reina Sofia University Hospital, University of Cordoba, 14004 Cordoba, Spain
- <sup>23</sup> Internal Medicine Service, Hospital Clínic, University of Barcelona, 08036 Barcelona, Spain
- <sup>24</sup> Department of Endocrinology, Virgen de la Victoria Hospital, Instituto de Investigación Biomédica de Málaga (IBIMA), University of Málaga, 29010 Málaga, Spain
- <sup>25</sup> Research Unit, Department of Family Medicine, Distrito Sanitario Atención Primaria Sevilla, 41010 Sevilla, Spain
- <sup>26</sup> Research Institute of Biomedical and Health Sciences (IUIBS), University of Las Palmas de Gran Canaria & Centro Hospitalario Universitario Insular Materno Infantil (CHUIMI), Canarian Health Service, 35016 Las Palmas de Gran Canaria, Spain
- <sup>27</sup> Department of Preventive Medicine and Public Health, University of Granada, 18016 Granada, Spain
- <sup>28</sup> Research Group on Community Nutrition & Oxidative Stress, IUNICS, University of Balearic Islands, 07122 Palma de Mallorca, Spain
- <sup>29</sup> Institute of Biomedicine (IBIOMED), University of León, 24071 León, Spain
- <sup>30</sup> Lipids and Vascular Risk Unit, Internal Medicine, Hospital Universitario de Bellvitge, Hospitalet de Llobregat, 08908 Barcelona Spain
- <sup>31</sup> Division of Preventive Medicine, Faculty of Medicine, University of Jaén, 23071 Jaén, Spain
- <sup>32</sup> Department of Endocrinology and Nutrition, Instituto de Investigación Sanitaria Hospital Clínico San Carlos (IdISSC), 28040 Madrid, Spain; pilar.matia@gmail.com
- <sup>33</sup> CIBER Diabetes y Enfermedades Metabólicas (CIBERDEM), Instituto de Salud Carlos III (ISCIII), 28029 Madrid, Spain; jovidal@clinic.cat
- <sup>34</sup> Department of Endocrinology, Institut d'Investigacions Biomèdiques August Pi Sunyer (IDIBAPS), Hospital Clínic, University of Barcelona, 08036 Barcelona, Spain
- <sup>35</sup> Department of Endocrinology and Nutrition, Hospital Fundación Jimenez Díaz, Instituto de Investigaciones Biomédicas IISFJD, University Autonoma, 28040 Madrid, Spain
- <sup>36</sup> Department of Endocrinology and Nutrition, Hospital Clínic, 08036 Barcelona, Spain; SERRAMIR@clinic.cat
- <sup>37</sup> Unidad de Gestión Clínica Arroyo de la Miel, Distrito de Atención Primaria Costa del Sol, Servicio Andaluz de Salud, 29630 Benalmádena, Málaga, Spain; rosa.carabano.sspa@juntadeandalucia.es
- <sup>38</sup> Osasunbidea, Servicio Navarro de Salud, Atención Primaria, 31003 Pamplona, Spain
- <sup>39</sup> IDIAP Jordi Gol i Gurina, 43202 Reus, Spain
- \* Correspondence: lamuela@ub.edu; Tel.: +34-934034843

**Table S1.** Limits of detection and quantification, concentration range and r of the calibration curves of the different carotenoids ( $\mu\text{mol/L}$ ).

| Analyte                              | LoD    | LoQ   | Concentration range | r      |
|--------------------------------------|--------|-------|---------------------|--------|
| astaxanthin                          | 0.009  | 0.17  | 0.17 – 5.03         | 0.9965 |
| lutein                               | 0.023  | 0.88  | 0.88 – 8.79         | 0.9978 |
| zeaxanthin                           | 0.120  | 0.88  | 0.88 – 5.27         | 0.9930 |
| canthaxanthin                        | 0.0005 | 0.089 | 0.089 – 5.31        | 0.9975 |
| <i>E</i> - $\beta$ -apo-8'-carotenal | 0.018  | 0.12  | 0.12 – 7.20         | 0.9967 |
| $\beta$ -cryptoxanthin               | 0.004  | 0.02  | 0.02 – 18.09        | 0.9982 |
| 13- <i>Z</i> - $\beta$ -carotene     | 0.072  | 0.93  | 0.93 – 18.63        | 0.9909 |
| $\alpha$ -carotene                   | 0.037  | 0.12  | 0.12 – 1.86         | 0.9932 |
| $\beta$ -carotene                    | 0.021  | 0.19  | 0.19 – 18.63        | 0.9927 |
| 9- <i>Z</i> - $\beta$ -carotene      | 0.129  | 0.93  | 0.93 – 18.63        | 0.9967 |
| lycopene                             | 0.005  | 0.09  | 0.09 – 9.31         | 0.9974 |

LoD, Limit of detection; LoQ, limit of quantification; r, correlation coefficient.

**Table S2.** Main dietary nutrient intake and food consumption by group.

|                                    | Low F&V             |               | High F&V            |               | <i>p</i> -value* |
|------------------------------------|---------------------|---------------|---------------------|---------------|------------------|
|                                    | Low-to-Moderate fat | Very high fat | Low-to-Moderate fat | Very high fat |                  |
| No. of subjects                    | 59                  | 58            | 60                  | 53            |                  |
| Mediterranean diet adherence score | 7.29 ± 2.33         | 6.67 ± 2.56   | 10.0 ± 2.49         | 9.83 ± 2.79   | < 0.001          |
| Total energy, Kcal/day             | 1701 ± 511          | 2803 ± 420    | 2026 ± 373          | 3161 ± 356    | < 0.001          |
| Nutrient intake                    |                     |               |                     |               |                  |
| Carbohydrates, g/day               | 180 ± 77.7          | 256 ± 74.8    | 249 ± 66.7          | 324 ± 67.9    | < 0.001          |
| Fiber, g/day                       | 15.5 ± 6.15         | 19.2 ± 4.79   | 35.3 ± 6.39         | 42.5 ± 8.87   | < 0.001          |
| Protein, g/day                     | 70.8 ± 18.2         | 99.1 ± 19.6   | 89.8 ± 19.5         | 127 ± 21.7    | < 0.001          |
| Total fat, g/day                   | 64.8 ± 15.3         | 140 ± 14.6    | 69.7 ± 12.6         | 142 ± 16.9    | < 0.001          |
| SFA, g/day                         | 17.7 ± 4.44         | 36.9 ± 7.19   | 17.8 ± 4.66         | 34.5 ± 7.14   | < 0.001          |
| MUFA, g/day                        | 32.4 ± 8.69         | 72.8 ± 11.0   | 33.7 ± 7.81         | 75.5 ± 12.4   | < 0.001          |
| PUFA, g/day                        | 9.87 ± 3.56         | 22.5 ± 6.10   | 12.2 ± 3.98         | 25.3 ± 7.75   | < 0.001          |
| Cholesterol, mg/day                | 292 ± 105           | 437 ± 130     | 317 ± 97.1          | 459 ± 134     | < 0.001          |
| Alcohol, g/day                     | 16.3 ± 20.9         | 17.3 ± 18.1   | 6.08 ± 11.1         | 11.6 ± 13.4   | < 0.001          |
| Food consumption, g/day            |                     |               |                     |               |                  |
| F&V                                | 278 ± 68.7          | 300 ± 52.7    | 1265 ± 299          | 1328 ± 270    | < 0.001          |
| Legumes                            | 14.2 ± 7.95         | 18.3 ± 7.94   | 24.3 ± 16.4         | 30.4 ± 17.2   | < 0.001          |
| Cereals                            | 140 ± 88.1          | 170 ± 85.3    | 129 ± 78.7          | 177 ± 82.4    | 0.005            |
| Dairy                              | 244 ± 113           | 360 ± 226     | 297 ± 213           | 380 ± 216     | 0.001            |
| Meat                               | 117 ± 44.9          | 151 ± 58.4    | 120 ± 48.0          | 171 ± 67.9    | < 0.001          |
| Fish                               | 64.6 ± 38.5         | 92.6 ± 53.8   | 100 ± 48.0          | 136 ± 56.5    | < 0.001          |
| Nuts                               | 5.11 ± 6.53         | 20.6 ± 21.4   | 10.5 ± 10.5         | 39.1 ± 30.7   | < 0.001          |
| Olive oil                          | 23.2 ± 11.1         | 53.4 ± 15.5   | 24.0 ± 10.6         | 48.1 ± 16.4   | < 0.001          |
| Sunflower oil                      | 1.40 ± 3.76         | 2.04 ± 5.72   | 0.91 ± 3.53         | 2.34 ± 7.22   | 0.455            |
| Butter                             | 0.75 ± 2.22         | 1.87 ± 4.77   | 0.56 ± 2.18         | 0.87 ± 2.08   | 0.092            |
| Margarine                          | 0.68 ± 1.65         | 1.38 ± 3.44   | 0.35 ± 0.98         | 1.34 ± 3.08   | 0.065            |
| Pastries                           | 18.4 ± 20.2         | 40.9 ± 43.6   | 14.6 ± 18.8         | 31.8 ± 32.1   | < 0.001          |

SFA, saturated fatty acids; MUFA, monounsaturated fatty acids; PUFA, polyunsaturated fatty acids; F&V, fruit and vegetables.

Values are percentages for categorical variables and means ± SD for continuous variables.

\* *P*-values were calculated by analysis of variance—one factor was used for continuous variables and the  $\chi^2$ -test for categorical variables, *p* < 0.05.

**Table S3.** Differences in individual carotenoids plasma concentrations ( $\mu\text{mol/L}$ ) between F&V consumption groups.

|                        |                      | High F&V<br>vs.<br>Low F&V | <i>p</i> -value | High F&V vs.<br>Low F&V<br>(low-to-<br>moderate fat) | <i>p</i> -value | High F&V vs.<br>Low F&V<br>(high fat) | <i>p</i> -value |
|------------------------|----------------------|----------------------------|-----------------|------------------------------------------------------|-----------------|---------------------------------------|-----------------|
| $\alpha$ -carotene     | Median               | 0.19 vs. < 0.12            |                 | 0.21 vs. < 0.12                                      |                 | 0.14 vs. < 0.12                       |                 |
|                        | $\beta$ [CI]-model 1 | 0.15 [0.058; 0.24]         | 0.001           | 0.18 [0.052; 0.30]                                   | 0.005           | 0.11 [-0.017; 0.24]                   | 0.088           |
|                        | $\beta$ [CI]-model 2 | 0.11 [0.022; 0.20]         | 0.014           | 0.13 [0.007; 0.25]                                   | 0.038           | 0.088 [-0.039; 0.21]                  | 0.173           |
|                        | $\beta$ [CI]-model 3 | 0.10 [-0.006; 0.21]        | 0.064           | 0.094 [-0.048; 0.24]                                 | 0.197           | 0.045 [-0.1; 0.19]                    | 0.553           |
| $\beta$ -carotene      | Median               | 1.78 vs. < 0.02            |                 | 2.55 vs. < 0.02                                      |                 | 0.71 vs. < 0.02                       |                 |
|                        | $\beta$ [CI]-model 1 | 4.25 [2.27; 6.22]          | < 0.001         | 4.97 [2.33; 7.61]                                    | < 0.001         | 3.24 [0.40; 6.07]                     | 0.025           |
|                        | $\beta$ [CI]-model 2 | 3.76 [1.79; 5.73]          | < 0.001         | 4.34 [1.71; 6.98]                                    | 0.001           | 2.93 [0.14; 5.71]                     | 0.039           |
|                        | $\beta$ [CI]-model 3 | 4.31 [1.98; 6.64]          | < 0.001         | 4.52 [1.40; 7.64]                                    | 0.005           | 3.05 [-0.21; 6.31]                    | 0.066           |
| E-lycopene             | Median               | < 0.005 vs. < 0.005        |                 | < 0.09 vs. < 0.005                                   |                 | < 0.005 vs. < 0.005                   |                 |
|                        | $\beta$ [CI]-model 1 | 1.00 [-0.10; 2.10]         | 0.075           | 1.5 [-0.021; 3.03]                                   | 0.053           | 0.41 [-1.19; 2.00]                    | 0.617           |
|                        | $\beta$ [CI]-model 2 | 0.82 [-0.29; 1.93]         | 0.146           | 1.26 [-0.27; 2.80]                                   | 0.107           | 0.31 [-1.28; 1.89]                    | 0.704           |
|                        | $\beta$ [CI]-model 3 | 0.72 [-0.59; 2.02]         | 0.282           | 1.45 [-0.36; 3.26]                                   | 0.115           | 0.54 [-1.30; 2.37]                    | 0.567           |
| Z-lycopene             | Median               | < 0.005 vs. < 0.005        |                 | < 0.005 vs. < 0.005                                  |                 | < 0.005 vs. < 0.005                   |                 |
|                        | $\beta$ [CI]-model 1 | 0.63 [-0.41; 1.68]         | 0.233           | 1.14 [-0.30; 2.57]                                   | 0.120           | 0.042 [-1.48; 1.56]                   | 0.957           |
|                        | $\beta$ [CI]-model 2 | 0.48 [-0.57; 1.54]         | 0.368           | 0.93 [-0.52; 2.39]                                   | 0.207           | -0.039 [-1.55; 1.47]                  | 0.959           |
|                        | $\beta$ [CI]-model 3 | 0.024 [-1.22; 1.27]        | 0.970           | 0.35 [-1.34; 2.03]                                   | 0.686           | -0.58 [-2.33; 1.18]                   | 0.518           |
| Sum lycopene           | Median               | < 0.09 vs. < 0.09          |                 | 0.29 vs. < 0.09                                      |                 | < 0.09 vs. < 0.09                     |                 |
|                        | $\beta$ [CI]-model 1 | 1.63 [-0.17; 3.43]         | 0.076           | 2.56 [0.07; 5.05]                                    | 0.044           | 0.55 [-2.06; 3.15]                    | 0.681           |
|                        | $\beta$ [CI]-model 2 | 1.35 [-0.47; 3.17]         | 0.145           | 2.18 [-0.33; 4.70]                                   | 0.089           | 0.39 [-2.20; 2.98]                    | 0.768           |
|                        | $\beta$ [CI]-model 3 | 0.94 [-1.21; 3.09]         | 0.393           | 2.01 [-0.94; 4.97]                                   | 0.182           | 0.30 [-2.71; 3.31]                    | 0.845           |
| astaxanthin            | Median               | 0.44 vs. 0.35              |                 | 0.42 vs. 0.31                                        |                 | 0.48 vs. 0.36                         |                 |
|                        | $\beta$ [CI]-model 1 | 0.15 [0.038; 0.26]         | 0.009           | 0.18 [0.027; 0.34]                                   | 0.022           | 0.12 [-0.044; 0.28]                   | 0.155           |
|                        | $\beta$ [CI]-model 2 | 0.14 [0.027; 0.26]         | 0.016           | 0.17 [0.014; 0.33]                                   | 0.033           | 0.11 [-0.05; 0.27]                    | 0.175           |
|                        | $\beta$ [CI]-model 3 | 0.12 [-0.015; 0.25]        | 0.082           | 0.17 [-0.011; 0.35]                                  | 0.066           | 0.068 [-0.12; 0.25]                   | 0.471           |
| lutein                 | Median               | < 0.88 vs. < 0.02          |                 | < 0.88 vs. < 0.88                                    |                 | < 0.88 vs. < 0.02                     |                 |
|                        | $\beta$ [CI]-model 1 | 0.64 [0.29; 0.99]          | < 0.001         | 0.63 [0.16; 1.10]                                    | 0.009           | 0.65 [0.14; 1.16]                     | 0.012           |
|                        | $\beta$ [CI]-model 2 | 0.52 [0.18; 0.87]          | 0.003           | 0.48 [0.013; 0.94]                                   | 0.044           | 0.57 [0.073; 1.06]                    | 0.025           |
|                        | $\beta$ [CI]-model 3 | 0.48 [0.076; 0.88]         | 0.020           | 0.31 [-0.23; 0.84]                                   | 0.259           | 0.33 [-0.23; 0.90]                    | 0.250           |
| canthaxanthin          | Median               | 0.16 vs. 0.18              |                 | 0.18 vs. 0.18                                        |                 | 0.15 vs. 0.17                         |                 |
|                        | $\beta$ [CI]-model 1 | 0.001 [-0.062; 0.064]      | 0.969           | 0.027 [-0.06; 0.11]                                  | 0.542           | -0.028 [-0.12; 0.062]                 | 0.538           |
|                        | $\beta$ [CI]-model 2 | -0.003 [-0.067; 0.062]     | 0.937           | 0.022 [-0.067; 0.11]                                 | 0.626           | -0.031 [-0.12; 0.06]                  | 0.505           |
|                        | $\beta$ [CI]-model 3 | 0.039 [-0.037; 0.12]       | 0.314           | 0.023 [-0.079; 0.12]                                 | 0.663           | -0.02 [-0.13; 0.085]                  | 0.710           |
| $\beta$ -cryptoxanthin | Median               | 0.72 vs. 0.24              |                 | 0.78 vs. 0.24                                        |                 | 0.69 vs. 0.24                         |                 |
|                        | $\beta$ [CI]-model 1 | 0.58 [0.42; 0.75]          | < 0.00001       | 0.70 [0.47; 0.93]                                    | < 0.00001       | 0.45 [0.21; 0.69]                     | < 0.001         |
|                        | $\beta$ [CI]-model 2 | 0.58 [0.41; 0.75]          | < 0.00001       | 0.69 [0.46; 0.93]                                    | < 0.00001       | 0.45 [0.21; 0.69]                     | < 0.001         |
|                        | $\beta$ [CI]-model 3 | 0.60 [0.40; 0.81]          | < 0.00001       | 0.70 [0.43; 0.97]                                    | < 0.00001       | 0.44 [0.16; 0.72]                     | 0.002           |

$\beta$ , difference between groups; CI, confidence interval.

Model 1— adjusted for age and sex. Model 2—adjusted for age, sex and physical activity. Model 3—adjusted for the variables used in model 2 plus energy intake, the modified Mediterranean diet adherence score (subtracting the questions regarding F&V, fat and wine) and alcohol consumption (g/day). *P*-values < 0.05 were considered significant.

**Table S4.** Differences in individual carotenoids plasma concentrations ( $\mu\text{mol/L}$ ) between fat intake groups.

|                        |                      | High fat vs. Low-to-Moderate fat | <i>p</i> -value | High fat vs. Low-to-Moderate fat (low F&V) | <i>p</i> -value | High fat vs. Low-to-Moderate fat (high F&V) | <i>p</i> -value |
|------------------------|----------------------|----------------------------------|-----------------|--------------------------------------------|-----------------|---------------------------------------------|-----------------|
| $\alpha$ -carotene     | Median               | < 0.12 vs. 0.16                  |                 | < 0.12 vs. < 0.12                          |                 | 0.14 vs. 0.21                               |                 |
|                        | $\beta$ [CI]-model 1 | -0.049 [-0.14; 0.043]            | 0.295           | -0.012 [-0.14; 0.12]                       | 0.858           | -0.076 [-0.20; 0.051]                       | 0.241           |
|                        | $\beta$ [CI]-model 2 | -0.053 [-0.14; 0.035]            | 0.239           | -0.027 [-0.15; 0.098]                      | 0.671           | -0.07 [-0.19; 0.053]                        | 0.265           |
|                        | $\beta$ [CI]-model 3 | -0.13 [-0.28; 0.008]             | 0.064           | -0.071 [-0.25; 0.11]                       | 0.437           | -0.12 [-0.30; 0.059]                        | 0.189           |
| $\beta$ -carotene      | Median               | < 0.02 vs. 0.33                  |                 | < 0.02 vs. < 0.02                          |                 | 0.71 vs. 2.55                               |                 |
|                        | $\beta$ [CI]-model 1 | -1.87 [-3.87; 0.12]              | 0.066           | -0.78 [-3.63; 2.07]                        | 0.592           | -2.51 [-5.1; 0.073]                         | 0.057           |
|                        | $\beta$ [CI]-model 2 | -1.88 [-3.81; 0.051]             | 0.056           | -0.97 [-3.76; 1.82]                        | 0.496           | -2.39 [-4.92; 0.15]                         | 0.065           |
|                        | $\beta$ [CI]-model 3 | -3.70 [-6.85; -0.55]             | 0.021           | -0.61 [-4.65; 3.43]                        | 0.767           | -2.08 [-5.89; 1.74]                         | 0.287           |
| E-lycopene             | Median               | < 0.005 vs. < 0.005              |                 | < 0.005 vs. < 0.005                        |                 | < 0.005 vs. < 0.09                          |                 |
|                        | $\beta$ [CI]-model 1 | -0.38 [-1.49; 0.73]              | 0.501           | 0.23 [-1.35; 1.80]                         | 0.777           | -0.87 [-2.41; 0.67]                         | 0.269           |
|                        | $\beta$ [CI]-model 2 | -0.42 [-1.51; 0.67]              | 0.452           | 0.12 [-1.45; 1.68]                         | 0.884           | -0.84 [-2.37; 0.69]                         | 0.281           |
|                        | $\beta$ [CI]-model 3 | 0.30 [-1.45; 2.06]               | 0.734           | 1.39 [-0.90; 3.68]                         | 0.235           | 0.47 [-1.72; 2.66]                          | 0.672           |
| Z-lycopene             | Median               | < 0.005 vs. < 0.005              |                 | < 0.005 vs. < 0.005                        |                 | < 0.005 vs. < 0.005                         |                 |
|                        | $\beta$ [CI]-model 1 | -0.29 [-1.34; 0.77]              | 0.595           | 0.30 [-1.19; 1.79]                         | 0.694           | -0.80 [-2.27; 0.68]                         | 0.289           |
|                        | $\beta$ [CI]-model 2 | -0.31 [-1.35; 0.73]              | 0.559           | 0.21 [-1.27; 1.69]                         | 0.781           | -0.76 [-2.22; 0.70]                         | 0.305           |
|                        | $\beta$ [CI]-model 3 | -0.31 [-1.97; 1.35]              | 0.718           | 0.14 [-2.00; 2.28]                         | 0.896           | -0.78 [-2.85; 1.28]                         | 0.458           |
| Sum lycopene           | Median               | < 0.09 vs. < 0.09                |                 | < 0.09 vs. < 0.09                          |                 | < 0.09 vs. 0.29                             |                 |
|                        | $\beta$ [CI]-model 1 | -0.59 [-2.40; 1.23]              | 0.526           | 0.52 [-2.05; 3.10]                         | 0.691           | -1.49 [-4.02; 1.03]                         | 0.246           |
|                        | $\beta$ [CI]-model 2 | -0.65 [-2.44; 1.14]              | 0.478           | 0.35 [-2.21; 2.91]                         | 0.79            | -1.45 [-3.94; 1.05]                         | 0.257           |
|                        | $\beta$ [CI]-model 3 | 0.072 [-2.78; 2.93]              | 0.961           | 1.69 [-2.04; 5.41]                         | 0.375           | -0.029 [-3.59; 3.53]                        | 0.987           |
| astaxanthin            | Median               | 0.37 vs. 0.38                    |                 | 0.36 vs. 0.31                              |                 | 0.48 vs. 0.42                               |                 |
|                        | $\beta$ [CI]-model 1 | 0.045 [-0.067; 0.16]             | 0.428           | 0.078 [-0.08; 0.24]                        | 0.330           | 0.012 [-0.15; 0.17]                         | 0.887           |
|                        | $\beta$ [CI]-model 2 | 0.039 [-0.074; 0.15]             | 0.496           | 0.075 [-0.083; 0.23]                       | 0.351           | 0.013 [-0.15; 0.17]                         | 0.875           |
|                        | $\beta$ [CI]-model 3 | -0.059 [-0.23; 0.12]             | 0.511           | 0.056 [-0.16; 0.28]                        | 0.617           | -0.044 [-0.26; 0.18]                        | 0.700           |
| lutein                 | Median               | < 0.88 vs. < 0.88                |                 | < 0.02 vs. < 0.88                          |                 | < 0.88 vs. < 0.88                           |                 |
|                        | $\beta$ [CI]-model 1 | -0.32 [-0.67; 0.037]             | 0.079           | -0.33 [-0.83; 0.18]                        | 0.204           | -0.31 [-0.78; 0.17]                         | 0.208           |
|                        | $\beta$ [CI]-model 2 | -0.33 [-0.67; 0.014]             | 0.060           | -0.37 [-0.86; 0.12]                        | 0.140           | -0.28 [-0.74; 0.18]                         | 0.233           |
|                        | $\beta$ [CI]-model 3 | -0.68 [-1.22; -0.15]             | 0.013           | -0.52 [-1.21; 0.17]                        | 0.139           | -0.49 [-1.16; 0.17]                         | 0.147           |
| canthaxanthin          | Median               | 0.15 vs. 0.18                    |                 | 0.17 vs. 0.18                              |                 | 0.15 vs. 0.18                               |                 |
|                        | $\beta$ [CI]-model 1 | -0.041 [-0.10; 0.022]            | 0.206           | -0.014 [-0.10; 0.074]                      | 0.763           | -0.069 [-0.16; 0.021]                       | 0.132           |
|                        | $\beta$ [CI]-model 2 | -0.041 [-0.10; 0.022]            | 0.199           | -0.015 [-0.10; 0.073]                      | 0.731           | -0.068 [-0.16; 0.021]                       | 0.135           |
|                        | $\beta$ [CI]-model 3 | -0.12 [-0.22; -0.018]            | 0.020           | -0.096 [-0.22; 0.029]                      | 0.131           | -0.14 [-0.27; -0.012]                       | 0.032           |
| $\beta$ -cryptoxanthin | Median               | 0.38 vs. 0.51                    |                 | 0.24 vs. 0.24                              |                 | 0.69 vs. 0.78                               |                 |
|                        | $\beta$ [CI]-model 1 | -0.18 [-0.36; -7e-05]            | 0.05            | -0.043 [-0.28; 0.19]                       | 0.720           | -0.29 [-0.52; -0.058]                       | 0.015           |
|                        | $\beta$ [CI]-model 2 | -0.19 [-0.37; -0.006]            | 0.042           | -0.045 [-0.28; 0.19]                       | 0.705           | -0.29 [-0.52; -0.057]                       | 0.015           |
|                        | $\beta$ [CI]-model 3 | -0.42 [-0.70; -0.13]             | 0.004           | 0.035 [-0.30; 0.37]                        | 0.837           | -0.23 [-0.56; 0.11]                         | 0.186           |

$\beta$ , difference between groups; CI, confidence interval.

Model 1— adjusted for age and sex. Model 2—adjusted for age, sex and physical activity. Model 3—adjusted for the variables used in model 2 plus energy intake, the modified Mediterranean diet adherence score (subtracting the questions regarding F&V, fat and wine) and alcohol consumption (g/day). *P*-values < 0.05 were considered significant.

**Table S5.** Differences in individual carotenoids plasma concentrations ( $\mu\text{mol/L}$ ) between extreme groups.

|                    |                         | Low-to-Moderate fat & high F&V vs.<br>High fat & low F&V | <i>p</i> -value | High fat & high F&V vs.<br>Low-to-Moderate fat & low<br>F&V | <i>p</i> -value |
|--------------------|-------------------------|----------------------------------------------------------|-----------------|-------------------------------------------------------------|-----------------|
| $\alpha$ -carotene | Median                  | 0.21 vs. < 0.12                                          |                 | 0.14 vs. < 0.12                                             |                 |
|                    | $\beta$ [CI]-model<br>1 | 0.19 [0.063; 0.31]                                       | 0.003           | 0.10 [-0.028; 0.23]                                         | 0.126           |
|                    | $\beta$ [CI]-model<br>2 | 0.16 [0.035; 0.28]                                       | 0.012           | 0.061 [-0.066; 0.19]                                        | 0.348           |
|                    | $\beta$ [CI]-model<br>3 | 0.16 [0.013; 0.32]                                       | 0.033           | -0.026 [-0.26; 0.20]                                        | 0.825           |
| $\beta$ -carotene  | Median                  | 2.55 vs. < 0.02                                          |                 | 0.71 vs. < 0.02                                             |                 |
|                    | $\beta$ [CI]-model<br>1 | 5.75 [3.03; 8.48]                                        | < 0.001         | 2.46 [-0.30; 5.22]                                          | 0.081           |
|                    | $\beta$ [CI]-model<br>2 | 5.31 [2.63; 8.00]                                        | < 0.001         | 1.96 [-0.78; 4.69]                                          | 0.161           |
|                    | $\beta$ [CI]-model<br>3 | 5.13 [1.82; 8.43]                                        | 0.002           | 2.44 [-2.64; 7.53]                                          | 0.347           |
| E-lycopene         | Median                  | < 0.09 vs. < 0.005                                       |                 | < 0.005 vs. < 0.005                                         |                 |
|                    | $\beta$ [CI]-model<br>1 | 1.28 [-0.24; 2.79]                                       | 0.098           | 0.63 [-0.97; 2.24]                                          | 0.438           |
|                    | $\beta$ [CI]-model<br>2 | 1.15 [-0.36; 2.65]                                       | 0.136           | 0.42 [-1.18; 2.03]                                          | 0.605           |
|                    | $\beta$ [CI]-model<br>3 | 0.062 [-1.79; 1.91]                                      | 0.948           | 1.93 [-1.00; 4.85]                                          | 0.197           |
| Z-lycopene         | Median                  | < 0.005 vs. < 0.005                                      |                 | < 0.005 vs. < 0.005                                         |                 |
|                    | $\beta$ [CI]-model<br>1 | 0.84 [-0.60; 2.28]                                       | 0.253           | 0.34 [-1.18; 1.86]                                          | 0.660           |
|                    | $\beta$ [CI]-model<br>2 | 0.72 [-0.71; 2.16]                                       | 0.323           | 0.17 [-1.36; 1.7]                                           | 0.827           |
|                    | $\beta$ [CI]-model<br>3 | 0.20 [-1.55; 1.96]                                       | 0.820           | -0.44 [-3.16; 2.29]                                         | 0.754           |
| Sum lycopene       | Median                  | 0.29 vs. < 0.09                                          |                 | < 0.09 vs. < 0.09                                           |                 |
|                    | $\beta$ [CI]-model<br>1 | 2.04 [-0.44; 4.52]                                       | 0.107           | 1.07 [-1.55; 3.69]                                          | 0.423           |
|                    | $\beta$ [CI]-model<br>2 | 1.83 [-0.63; 4.30]                                       | 0.145           | 0.74 [-1.89; 3.36]                                          | 0.582           |
|                    | $\beta$ [CI]-model<br>3 | 0.33 [-2.69; 3.35]                                       | 0.831           | 1.99 [-2.77; 6.74]                                          | 0.413           |
| astaxanthin        | Median                  | 0.42 vs. 0.36                                            |                 | 0.48 vs. 0.31                                               |                 |
|                    | $\beta$ [CI]-model<br>1 | 0.11 [-0.051; 0.26]                                      | 0.187           | 0.20 [0.034; 0.36]                                          | 0.018           |
|                    | $\beta$ [CI]-model<br>2 | 0.099 [-0.059; 0.26]                                     | 0.218           | 0.19 [0.023; 0.35]                                          | 0.025           |
|                    | $\beta$ [CI]-model<br>3 | 0.11 [-0.075; 0.30]                                      | 0.242           | 0.12 [-0.16; 0.41]                                          | 0.395           |
| lutein             | Median                  | < 0.88 vs. < 0.02                                        |                 | < 0.88 vs. < 0.88                                           |                 |
|                    | $\beta$ [CI]-model<br>1 | 0.96 [0.46; 1.46]                                        | < 0.001         | 0.33 [-0.16; 0.81]                                          | 0.190           |

|                 |                   |                      |           |                       |         |
|-----------------|-------------------|----------------------|-----------|-----------------------|---------|
|                 | β [CI]-model<br>2 | 0.85 [0.37; 1.33]    | < 0.001   | 0.20 [-0.28; 0.68]    | 0.413   |
|                 | β [CI]-model<br>3 | 0.83 [0.25; 1.40]    | 0.005     | -0.19 [-1.05; 0.68]   | 0.675   |
|                 | Median            | 0.18 vs. 0.17        |           | 0.15 vs. 0.18         |         |
| canthaxanthin   | β [CI]-model<br>1 | 0.041 [-0.047; 0.13] | 0.363     | -0.042 [-0.13; 0.048] | 0.362   |
|                 | β [CI]-model<br>2 | 0.038 [-0.051; 0.13] | 0.404     | -0.046 [-0.14; 0.045] | 0.321   |
|                 | β [CI]-model<br>3 | 0.12 [0.012; 0.23]   | 0.029     | -0.12 [-0.28; 0.047]  | 0.162   |
|                 | Median            | 0.78 vs. 0.24        |           | 0.69 vs. 0.24         |         |
| β-cryptoxanthin | β [CI]-model<br>1 | 0.74 [0.51; 0.97]    | < 0.00001 | 0.41 [0.17; 0.64]     | < 0.001 |
|                 | β [CI]-model<br>2 | 0.74 [0.51; 0.97]    | < 0.00001 | 0.4 [0.16; 0.64]      | 0.001   |
|                 | β [CI]-model<br>3 | 0.66 [0.38; 0.95]    | < 0.00001 | 0.47 [0.038; 0.91]    | 0.033   |

β, difference between groups; CI, confidence interval.

Model 1— adjusted for age and sex. Model 2—adjusted for age, sex and physical activity. Model 3—adjusted for the variables used in model 2 plus energy intake, the modified Mediterranean diet adherence score (subtracting the questions regarding F&V, fat and wine) and alcohol consumption (g/day). *P*-values < 0.05 were considered significant.
